# Supplementary material for: Functional analysis of filipin tailoring genes from Streptomyces filipinensis reveals alternative routes in filipin III biosynthesis and yields bioactive derivatives
Source: PubMed Central journal article supplement (PMC4527110; doi:10.1186/s12934-015-0307-4), 2015-08-07

**A**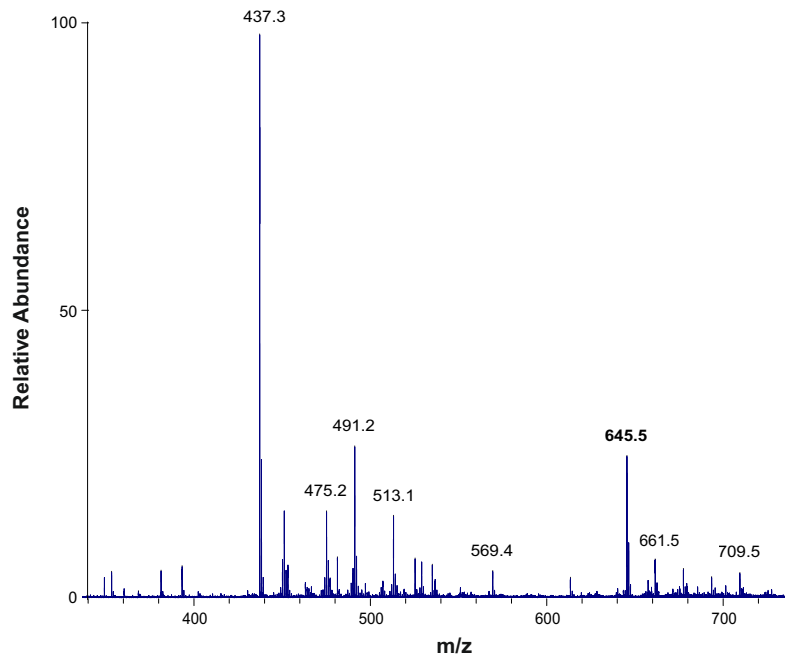**B**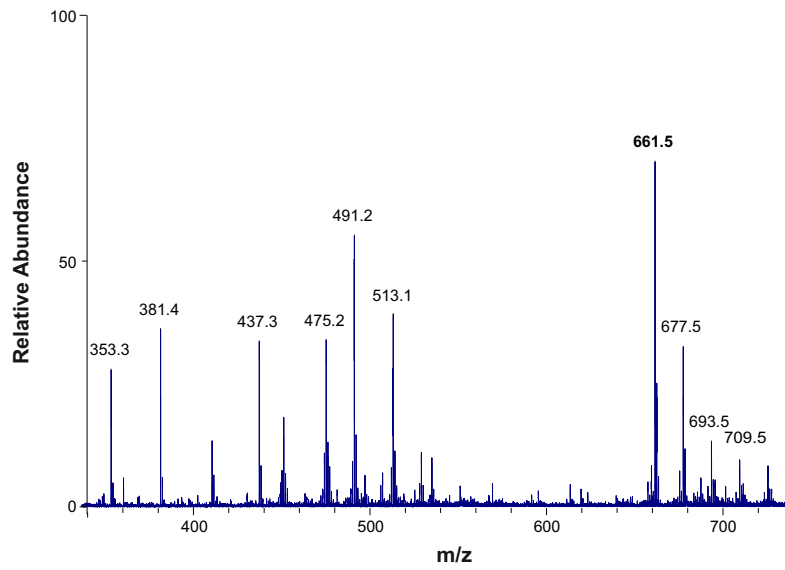**C**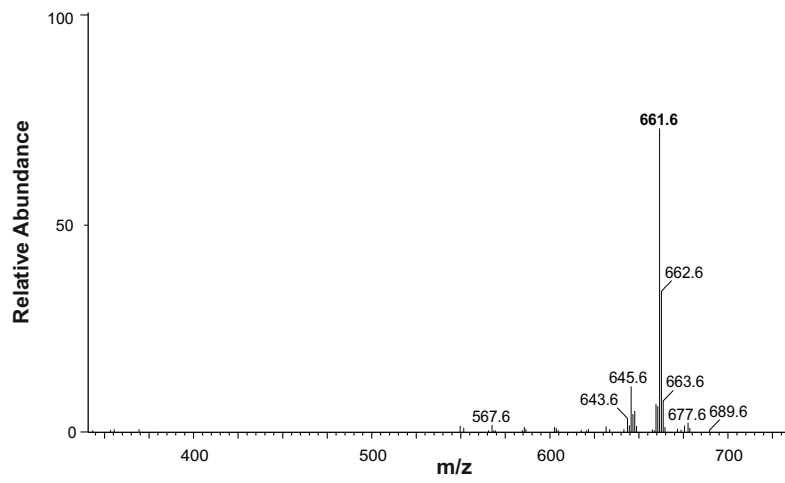

Supplement: 12934_2015_307_MOESM2_ESM.pdf [file 12934_2015_307_MOESM2_ESM.pdf]
